# Supplementary material
Source: PubMed Central journal article supplement (PMC8104025)
Supplement: Supp_Fig1.pdf [file Supp_Fig1.pdf]

## Supplementary Data

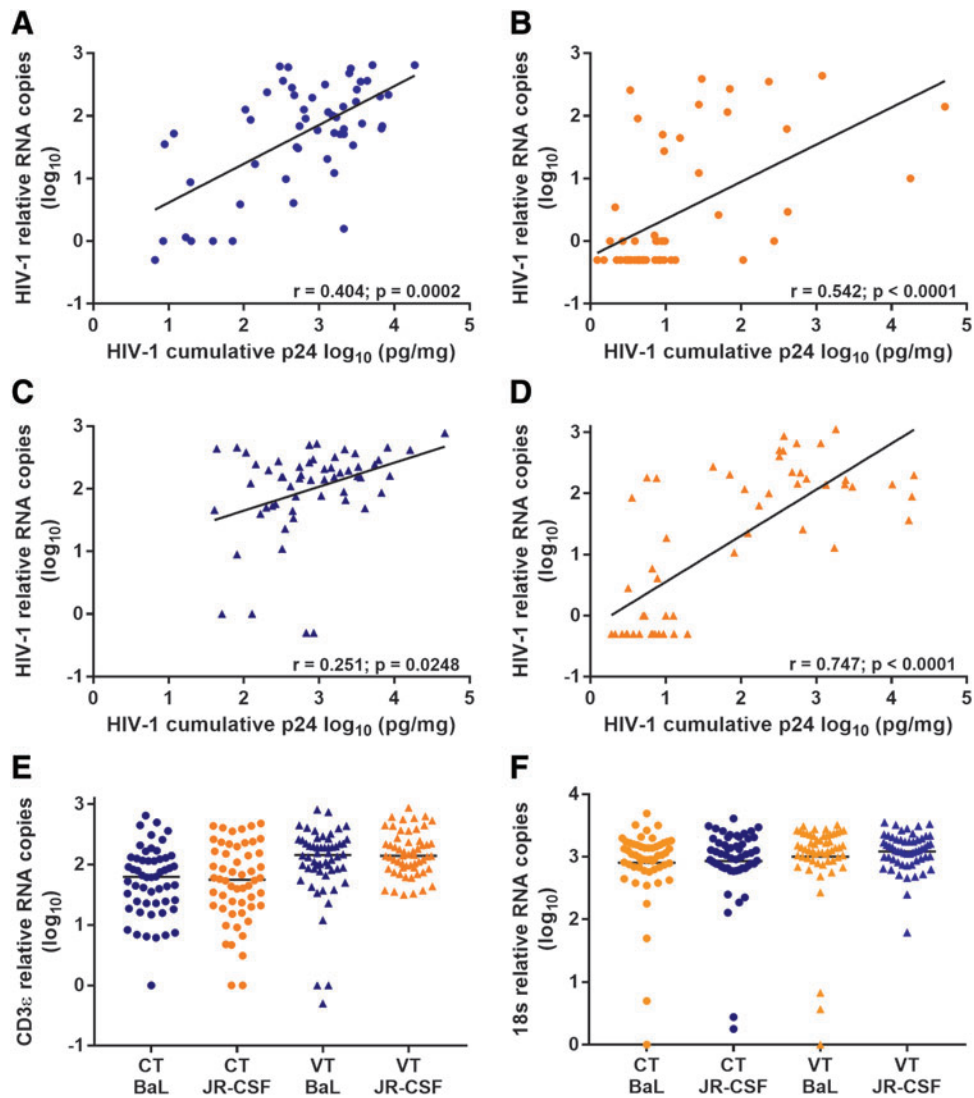

**SUPPLEMENTARY FIG. S1.** Correlation between cumulative p24 and HIV-1 relative RNA copies. Cumulative p24 in CT (A, C) and VT (B, D) biopsies was compared to HIV-1 relative RNA copies in tissues collected at study end. Linear regression showed that both measures significantly correlated. An RNA internal control of CD3<sub>ε</sub>, which reflects relative T cell CD3 expression, shows comparable expression between HIV-1<sub>BaL</sub> and HIV-1<sub>JR-CSF</sub> treated CT and VT, but CT had significantly lower CD3<sub>ε</sub> expression compared to VT (E). 18s relative RNA expression was similar between CT and VT, which reflects the general RNA internal control (F). CT, cervical tissue; VT, vaginal tissue.
